# Supplementary material for: Ultrasensitive DNA detection based on target-triggered rolling circle amplification and fluorescent poly(thymine)-templated copper nanoparticles
Source: Royal Society of Chemistry journal article supplement (doi:10.1039/c7ra11071e), 2018-01-01
Supplement: c7ra11071e1.pdf [file c7ra11071e1.pdf]

Supporting Information for

## **Ultrasensitive DNA detection based on target-triggered rolling circle amplification and fluorescent poly (thymine)-templated copper nanoparticles**

By Kwan Woo Park,<sup>†a</sup> Chang Yeol Lee,<sup>†a</sup> Bhagwan S. Batule,<sup>a</sup> Ki Soo Park<sup>\*b</sup> and Hyun Gyu Park<sup>\*a</sup>

<sup>a</sup>Department of Chemical and Biomolecular Engineering (BK 21+ program),  
KAIST, Daehak-ro 291, Yuseong-gu, Daejeon 34141, Republic of Korea

<sup>b</sup>Department of Biological Engineering, College of Engineering,  
Konkuk University, Seoul 05029, Republic of Korea

<sup>†</sup> The authors equally contributed to this work.

<sup>\*</sup> To whom correspondence should be addressed.

E-mail: hgpark@kaist.ac.kr (H.G. Park); Phone: +82-42-350-3932; Fax: +82-42-350-3910.

E-mail: kskonkuk@gmail.com (K.S. Park); Phone: +82-2-450-3742; Fax: +82-2-450-3742.

**Table S1** DNA sequences utilized in this study.

| Name                         | DNA sequence (5' → 3')                                             |
|------------------------------|--------------------------------------------------------------------|
| Padlock probe <sup>(a)</sup> | P-AGA CAG TGT TAA AAA AAA AAA AAA AAA AAA AAA AAC CAT<br>CTT TAC C |
| Target DNA                   | TAA CAC TGT CTG GTA AAG ATG G                                      |
| T1 <sup>(b)</sup>            | TAA CAC TGT CT <u>A</u> GTA AAG ATG G                              |
| T2 <sup>(b)</sup>            | TAA CAC TGT CT <u>C</u> GTA AAG ATG G                              |
| T3 <sup>(b)</sup>            | TAA CAC TGT CT <u>T</u> GTA AAG ATG G                              |

<sup>(a)</sup> 'P' indicates the phosphorylation.

<sup>(b)</sup> One base mismatch site in T1, T2, and T3 is underlined.

**Fig. S1** TEM image of the as-prepared poly T-CuNPs.

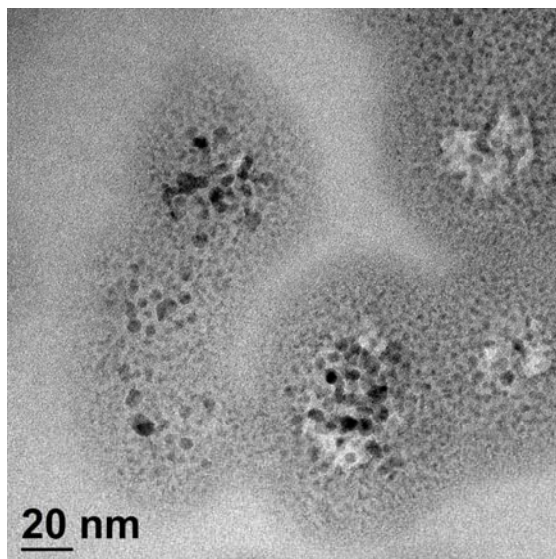

The as-prepared poly T-CuNPs are spherical in shape and have diameters of approximately 3 nm, which is in accordance with the previous report.<sup>1</sup>

**Fig. S2** Time-dependent fluorescence intensities at 525 nm from SYBR green II during the target-triggered RCA. The RCA reaction was executed at 30 °C and the fluorescence intensities were monitored at every 1 min using C1000™ thermal cycler (Bio-Rad, CA, USA). The final concentrations of padlock DNA probe and target DNA are 100 nM and 1 nM, respectively.

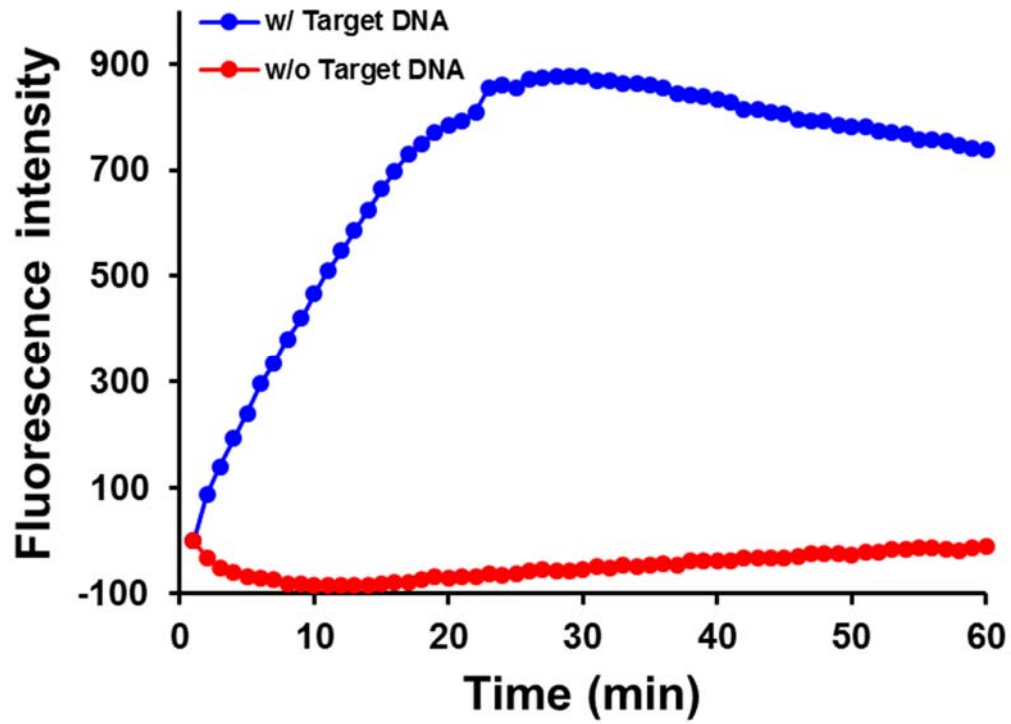

**Fig. S3** Optimization of the  $\text{Cu}^{2+}$  concentration for the efficient analysis of target DNA. The signal-to-noise ratio (S/N) is defined as  $F/F_0$ , where  $F_0$  and  $F$  are the fluorescence intensities at 650 nm from poly T-CuNPs synthesized after the target-triggered RCA in the absence and presence of target DNA, respectively. The final concentrations of padlock DNA probe and target DNA are 100 nM and 1 nM, respectively.

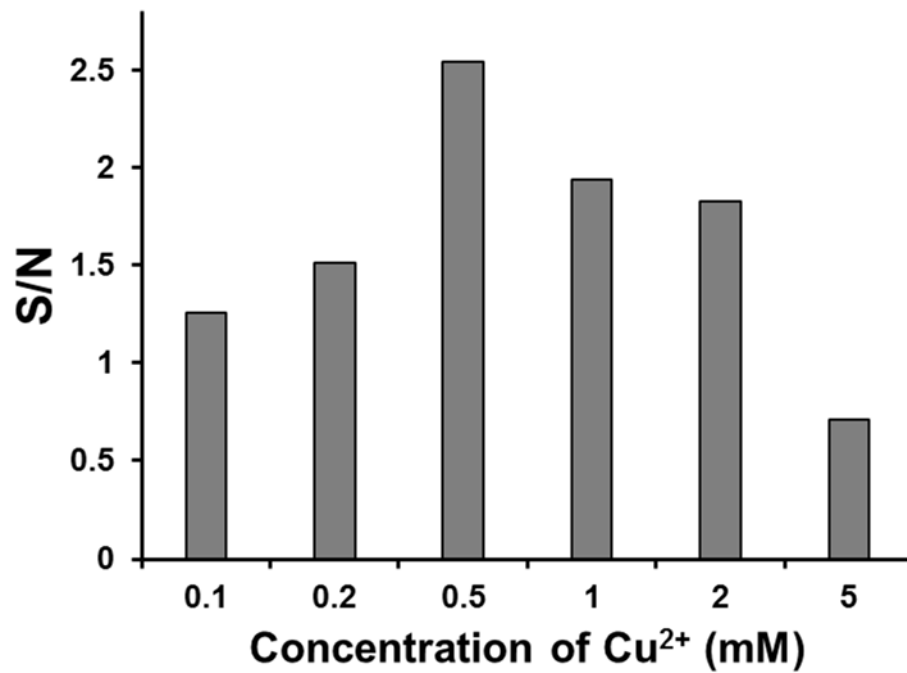

**Fig. S4** Practical applicability of the developed strategy.  $\Delta F_{650}$  ( $F-F_0$ , where  $F_0$  and  $F$  are the fluorescence intensities at 650 nm in the absence and presence of target DNA, respectively) in the presence of varying concentrations of target DNA and non-specific target DNAs with one base mismatch (10 nM, Table S1†) in human serum. The final concentration of padlock DNA probe is 1  $\mu$ M. All the experiments were performed in triplicate.

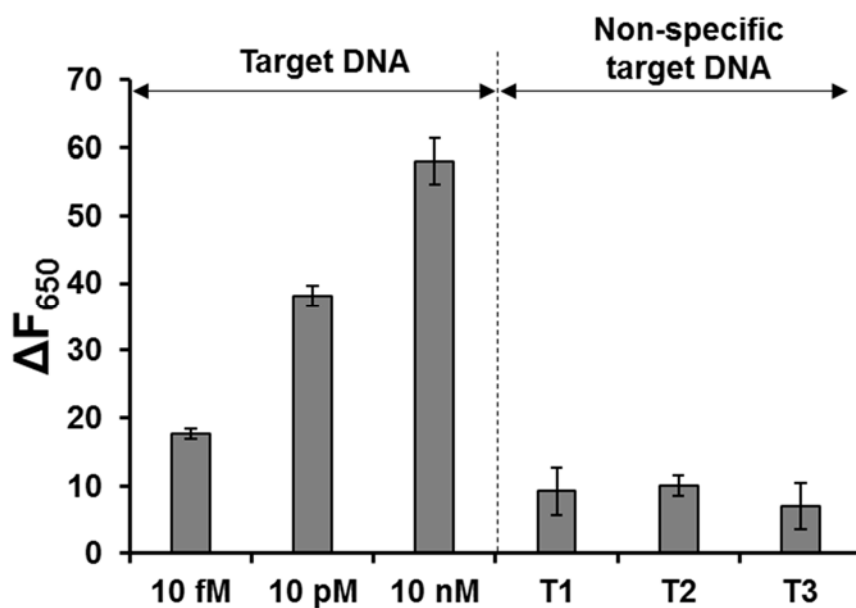

**Fig. S5** Schematic illustration for the detection of long target DNAs.

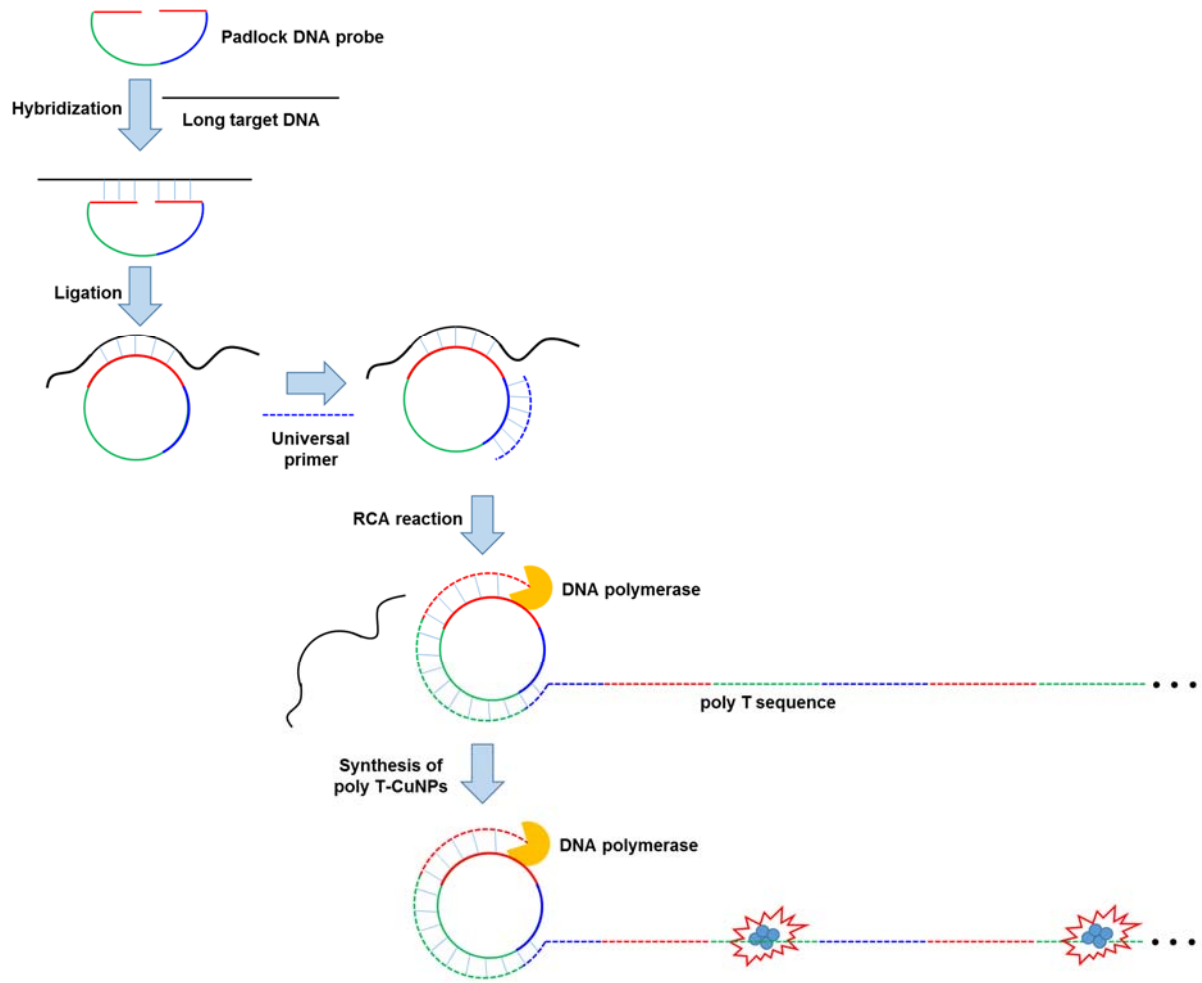

## References

- 1 F. Peng, Z. Liu, W. Li, Y. Huang, Z. Nie and S. Yao, *Anal. Met.*, 2015, **7**, 4355-4361.
